# Supplementary material for: The ribosomal protein S6 kinase alpha-1 (RPS6KA1) induces resistance to venetoclax/azacitidine in acute myeloid leukemia
Source: PubMed Central journal article supplement (PMC10400424; doi:10.1038/s41375-023-01951-8), 2023-07-06
Supplement: 41375_2023_1951_MOESM1_ESM.pdf [file 41375_2023_1951_MOESM1_ESM.pdf]

## Supplementary figures

### Supplementary Figure S1. Data analysis of the CRSIPR/Cas9 library screen.

- A Sequencing results of the OCI-AML2 CRISPR/Cas9 screen shown as the proportional read counts for each sgRNA included in the screen from  $1.3 \times 10^7$  reads in total. Shown are all technical replicates in blue and the original TKOv3 library as black line. More than 61 000 sgRNAs have a coverage of more than 100 reads.
- B Waterfall plot showing LFC values for all sgRNAs between treatment and control samples on day 14 after start of treatment.
- C Volcano plot (left) for median LFC values between day 14 and day 0 and the corresponding p-value for all sgRNAs per gene in the DMSO treated samples (control). Selected sgRNA-genes are shown in a bar plot (right) with median LFC values for all targeting sgRNAs. Highlighted are essential genes in red, non-targeting genes in orange and positively enriched sgRNA-genes in blue.
- D sgRNA-genes ranked by negative (left) and positive (right) MaGeCK score and p-value for the comparison of treated and untreated samples on day 14. RPS6KA1 is among the top negatively ranked sgRNA-genes. Highlighted are non-targeting and positively enriched sgRNA-genes in orange and blue, respectively.

### Supplementary Figure S2. Functional assays in parental AML cell lines validate BI-D1870 as novel drug combination partner for venetoclax/azacitidine.

- A MaGeCK ranking for negative enrichment of selected genes in CRISPR/Cas9 screens investigating venetoclax resistance. TP53, BAX and PMAIP1 were constantly identified among the top enriched genes (high negative rank) in different venetoclax mono CRISPR/Cas9 screens as well as in the venetoclax/azacitidine CRISPR/Cas9 screen presented in this study. Previously, CLPB (1) and DAP3 (2) were further validated as genes mediating resistance to venetoclax therapy, while TP53 was investigated as mediator of venetoclax response (3).
- B Median MaGeCK rank for negative enrichment of sgRNAs targeting TP53, BAX, PMAIP1 and RPS6KA1 in screens investigating venetoclax mono resistance versus the venetoclax/azacitidine screen presented in this study. Data indicate

that RPS6KA1 could specifically mediate venetoclax/azacitidine resistance but not venetoclax mono resistance.

- C Negative normalized enrichment scores of three gene sets related to biological functions of RPS6KA1 as analysed by GSEA.
- D Venetoclax/azacitidine response in dependence of BI-D1870 treatment. IC<sub>50</sub> of venetoclax/azacitidine (fixed 1:4 combination was used) was calculated in several cell lines under treatment with different concentrations of the RPS6KA1 inhibitor BI-D1870.
- E Parental (wt) Kasumi-1 and MV4-11 cells were treated with a premixed combination of venetoclax/azacitidine in serial dilutions and different concentrations of the RPS6KA1 inhibitor BI-D1870. Cell viability was assessed upon drug treatments for 72 hours and normalized to DMSO control. Depicted are means  $\pm$  SD from three technical replicates. Data are representative for three independent experiments.
- F Synergism was calculated for different drug combinations of venetoclax/azacitidine with BI-D1870 in parental (wt) Kasumi-1 and MV4-11 cells. The synergy score was computed according to the Bliss Independence Model and depicted as a heatmap. Positive and negative Bliss scores are indicative for synergism and antagonism, respectively, while neutral Bliss scores are often confounded by strong single drug effects.

Supplementary Figure S3. BI-D1870 increases apoptosis induction when combined with venetoclax or venetoclax/azacitidine.

- A-D OCI-AML2 (A, C) and MOLM-13 (B, D) cells were treated for 48 (A, B) or 72 hours (C, D) with 50 nM venetoclax, 200 or 500 nM azacitidine or the combination of both with or without 2  $\mu$ M BI-D1870. Apoptosis was measured by staining cells for Annexin V and PI and analysing cells by flow cytometry. Images are exemplary for technical triplicates and two independent experiments.
- E-F OCI-AML2 and MOLM-13 cells were treated with 50 nM venetoclax or 50 nM venetoclax and 200 nM azacitidine with or without 2  $\mu$ M BI-D1870 for 48 hours (E) or with 500 nM azacitidine or 100 nM venetoclax and 500 nM azacitidine with or without 2  $\mu$ M BI-D1870 for 72 hours (F). Fraction of apoptotic cells was analysed by Annexin/PI staining with flow cytometry and is given as mean  $\pm$  SD

from three technical replicates. Statistical significance was determined by a two-sided unpaired Student's t-test. \*\*  $p < 0.005$ . \*\*\*  $p < 0.0005$ . \*\*\*\*  $p < 0.00005$ .

Supplementary Figure S4. BI-D1870 influences BCL-2 family proteins when combined with venetoclax/azacitidine

- A Parental OCI-AML2 cells were treated with increasing doses of venetoclax/azacitidine in a 1:4 ratio. 1  $\mu\text{M}$  BI-D1870 or 10 or 50  $\mu\text{M}$  of the RSK inhibitor SL0101 were added. Viability is shown as mean  $\pm$  SD from three technical replicates. Data is representative for two independent experiments.
- B Parental OCI-AML2 cells were rendered resistant towards venetoclax/azacitidine treatment by weekly treatment with increasing doses of the drugs. Resistance was confirmed by an increased IC<sub>50</sub> concentration. It was determined by treating parental and resistant cells with different concentrations of venetoclax and azacitidine for 48 hours. Viability is shown as mean  $\pm$  SD from three technical replicates. Data is representative for two independent experiments.
- C-D OCI-AML2 (C) and HL-60 (D) cells were treated with given dose of venetoclax, azacitidine and/or BI-D1870 for 16 hours. Protein expression of pMCL-1 T163 was analyzed by western blotting. Quantification was performed using ImageJ. Data are representative for two independent experiments.
- E HL-60 cells were treated with venetoclax ( 50 nM) and azacitidine (100 nM) with or without 10  $\mu\text{M}$  BI-D1870 or 50  $\mu\text{M}$  SL0101 for 16 hours. Levels of BCL-2, BCL-XL and MCL-1 were determined by intracellular staining and analysis via flow cytometry. Analysis was carried out for cells in G1 state. Data is shown as mean  $\pm$  SD from three technical replicates.

Supplementary Figure S5. Flow cytometric analysis of myeloid subpopulations.

- A-D Flow cytometric analysis of cell surface markers. Parental (wt) OCI-AML2 cells were isolated after CFU assays under different treatment conditions, stained with a panel of myeloid differentiation markers (CD11b, CD64, CD117, GPR56 and CD34) and analyzed by flow cytometry. FACS plots are representative for one technical replicate out of three showing expression levels of the various differentiation markers. CD45 in different treatment conditions is shown in (A). Expression of CD11b and CD64 in the CD45 high population are depicted in

(B). The nonCD11bCD64 population was further analysed for CD34 and CD117 (C) as well as for CD34 and GPR56 (D).

E Analysis of CD14 cell surface marker by flow cytometry. The fraction of CD14+7-AAD- cells is higher in resistant (res) OCI-AML2 cells compared to parental (par) OCI-AML2 cells indicative for a more dominant subpopulation with monocytic differentiation.

### **Supplementary Tables**

Supplementary Table 1: Characteristics of primary AML samples that were analyzed.

Supplementary Table 2: Primer sequences used for two-step PCR in CRIPR/Cas9 screen.

Supplementary Table 3: sgRNA-ranking comparing treatment and control samples based on p-values

Supplementary Table 4: MaGeCK analysis showing negative and positive enrichment in control samples day 14 versus day 0

Supplementary Table 5: MaGeCK analysis showing negative and positive enrichment in treated samples day 14 versus day 0

Supplementary Table 6: MaGeCK analysis showing negative and positive enrichment in treated versus untreated samples at day 14

Supplementary Table 7: Absolute numbers of colonies counted in CFU assays conducted with primary patient samples.

### **References**

1. Chen X, Glytsou C, Zhou H, Narang S, Reyna DE, Lopez A, et al. Targeting Mitochondrial Structure Sensitizes Acute Myeloid Leukemia to Venetoclax Treatment. *Cancer Discov.* 2019;9(7):890-909.
2. Sharon D, Cathelin S, Mirali S, Di Trani JM, Yanofsky DJ, Keon KA, et al. Inhibition of mitochondrial translation overcomes venetoclax resistance in AML through activation of the integrated stress response. *Sci Transl Med.* 2019;11(516).
3. Nechiporuk T, Kurtz SE, Nikolova O, Liu T, Jones CL, D'Alessandro A, et al. The TP53 Apoptotic Network Is a Primary Mediator of Resistance to BCL2 Inhibition in AML Cells. *Cancer Discov.* 2019;9(7):910-25.

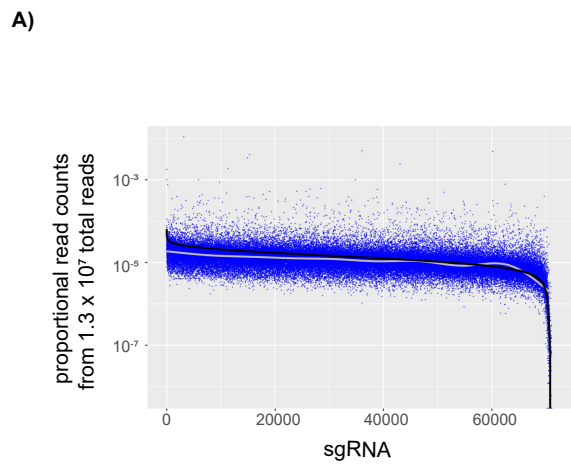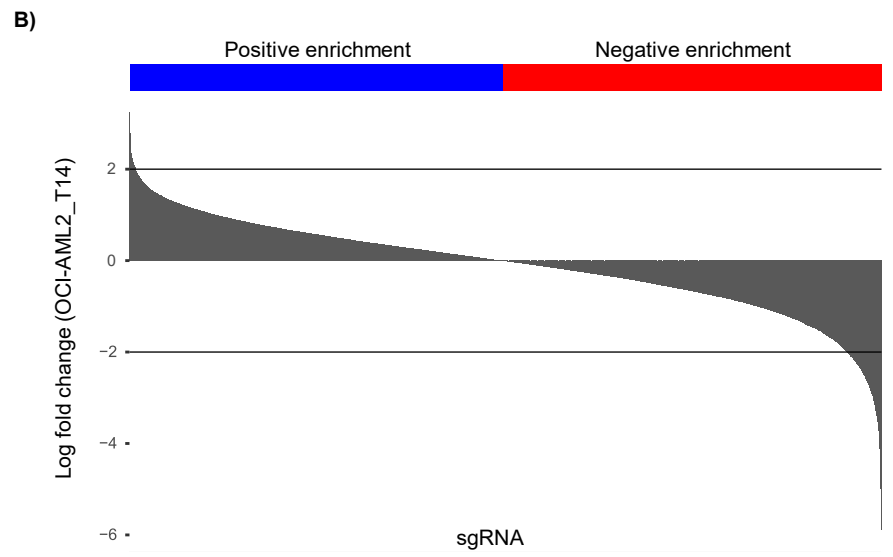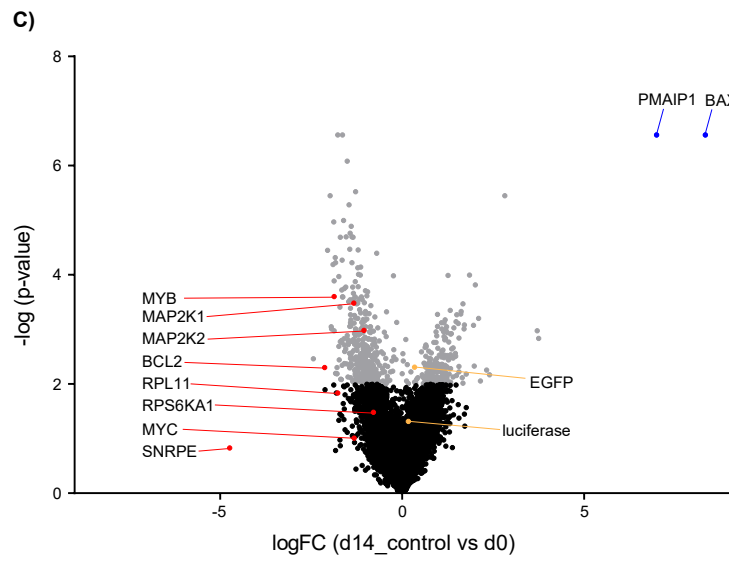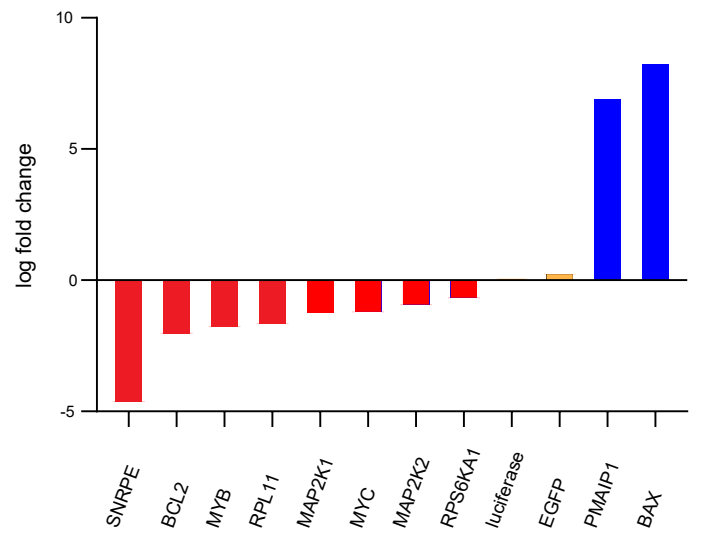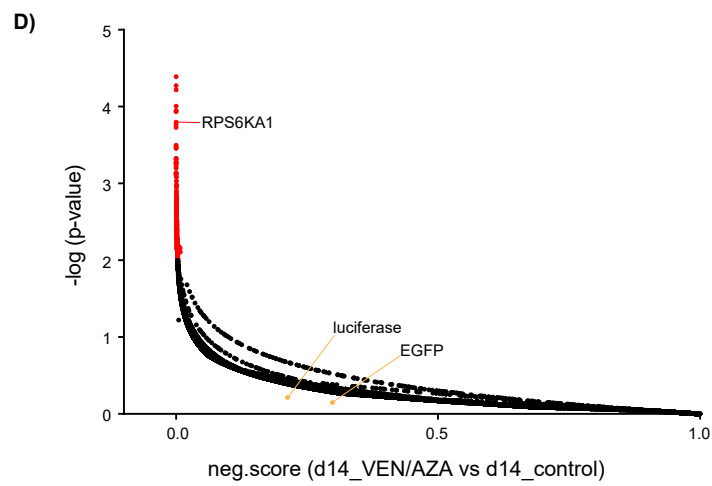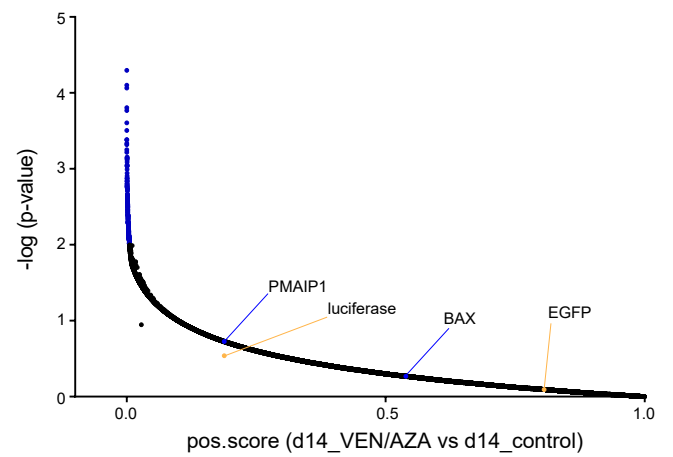

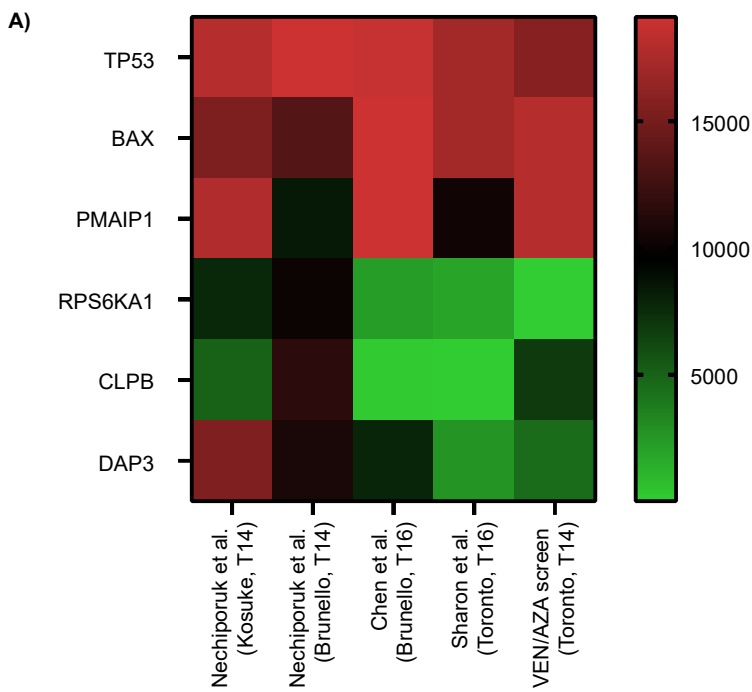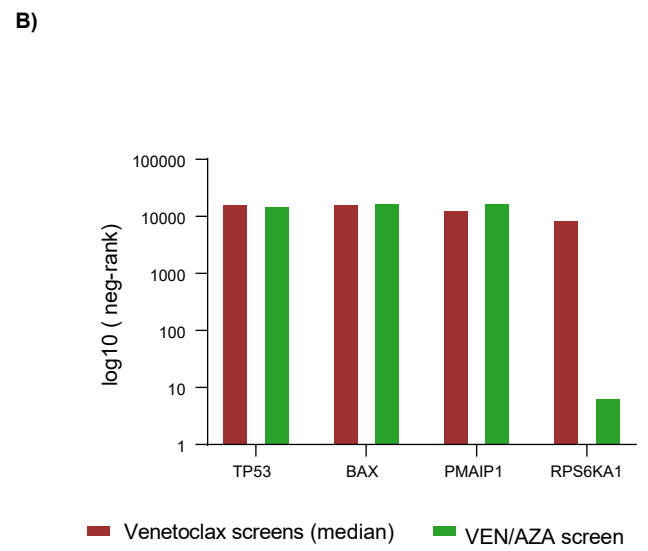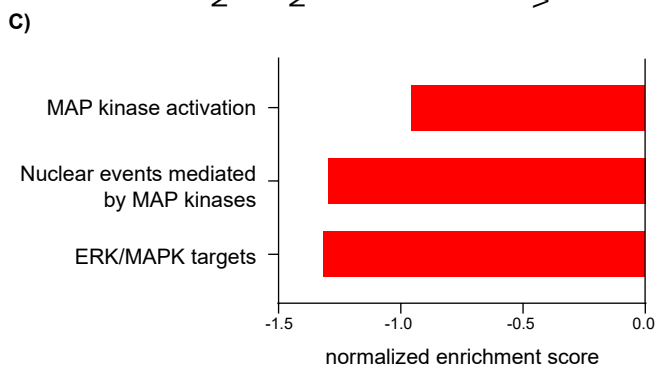

**D)** IC<sub>50</sub> [ x 2.5 nM Venetoclax / 10 nM Azacitidine]

|              | 0 nM BI-D1870 | 1 μM BI-D1870 | 2 μM BI-D1870 |
|--------------|---------------|---------------|---------------|
| OCI-AML2_wt  | 42.44         | 23.67         | 16.99         |
| OCI-AML2_res | 776.9         | 558.2         | 398.7         |
| MOLM-13      | 10.20         | 5.954         | 2.046         |
| HL-60        | 3087          | 1207          | 116.4         |
| MV4-11       | 112.7         | 53.67         | 59.06         |
| Kasumi-1     | 1.158         | 0.09017       | 0.00001803    |

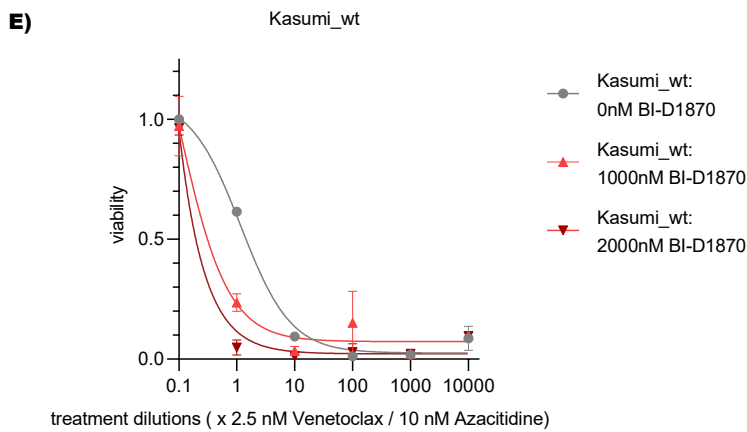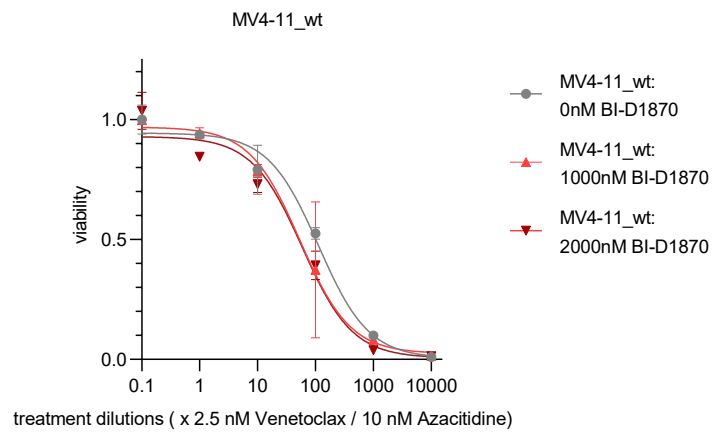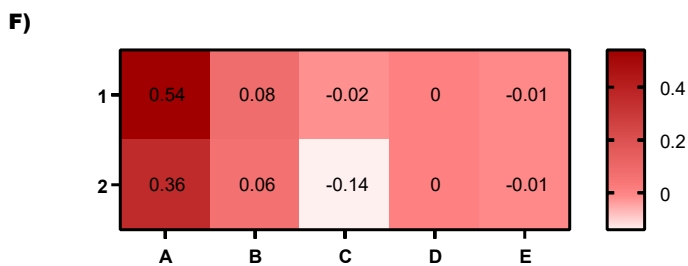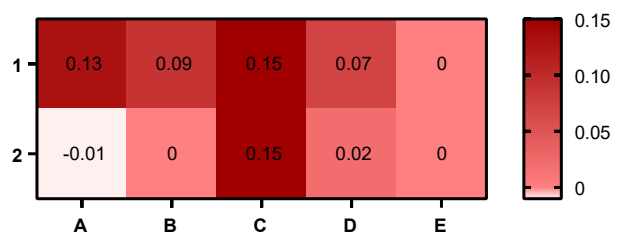

Apoptosis in OCI-AML2 and MOLM13 following treatment with VEN or AZA plus BI-D1870

A) OCI-AML2 48 hours following treatment

VEN 50nM

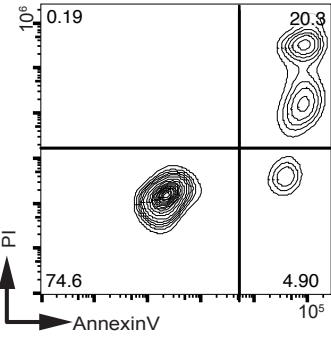

VEN 50nM + BI-D1870

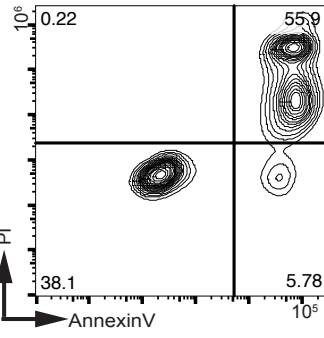

AZA 200nM

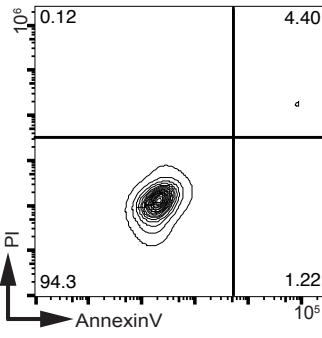

AZA 200nM + BI-D1870

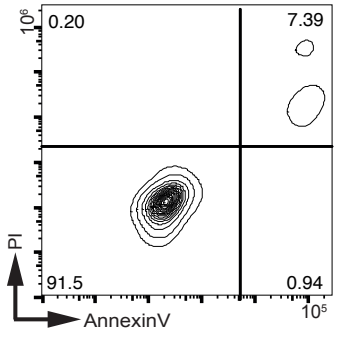

B) MOLM13 48 hours following treatment

VEN 50nM

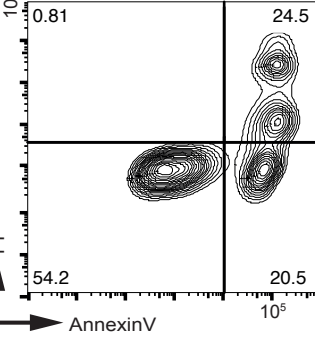

VEN 50nM + BI-D1870

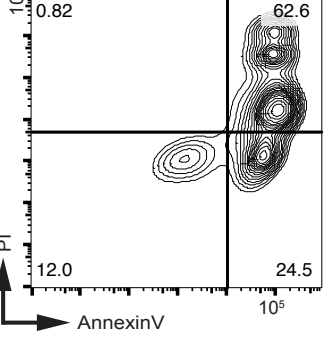

AZA 200nM

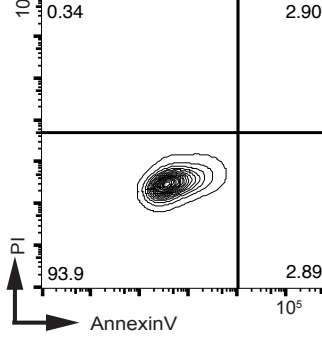

AZA 200nM + BI-D1870

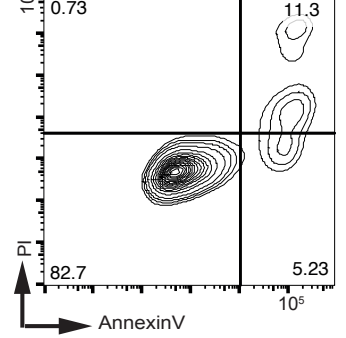

C) OCI-AML2 72 hours following treatment

AZA 500nM

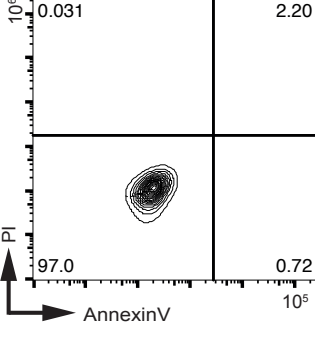

AZA 500nM + BI-D1870

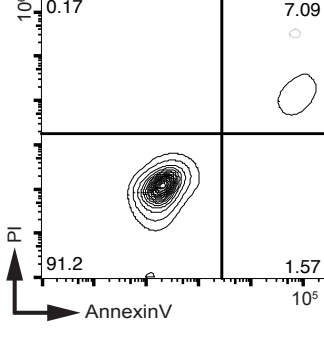

D) MOLM13 72 hours following treatment

AZA 500nM

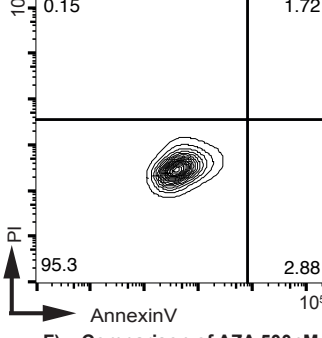

AZA 500nM + BI-D1870

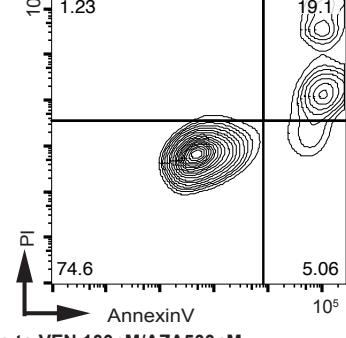

E) Comparison of VEN 50nM mono to VEN 50nM/AZA 200nM +/- BI-D1870 2µM

OCI-AML2 48 hours following treatment

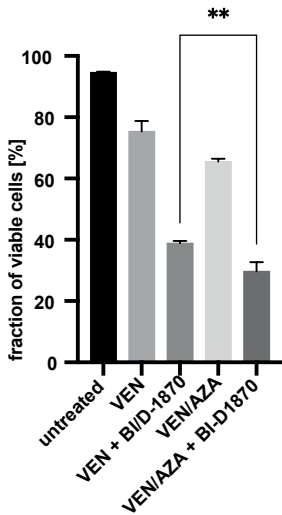

MOLM13 48 hours following treatment

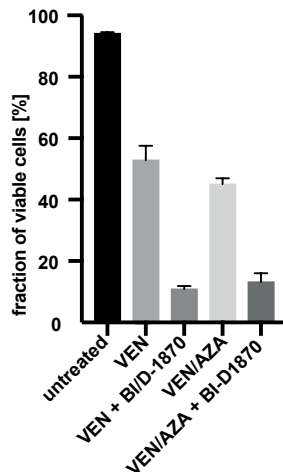

F) Comparison of AZA 500nM mono to VEN 100nM/AZA500nM +/- BI-D1870 2µM

OCI-AML2 72 hours following treatment

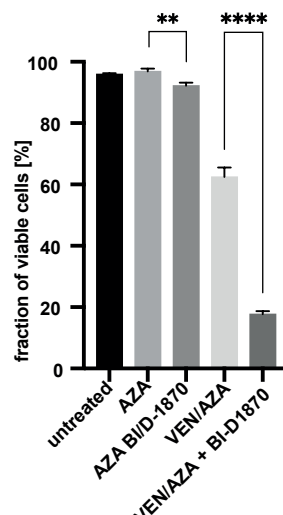

MOLM13 72 hours following treatment

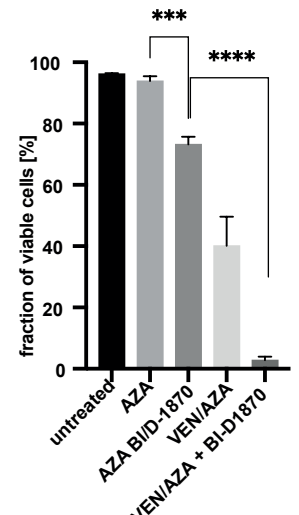

A)

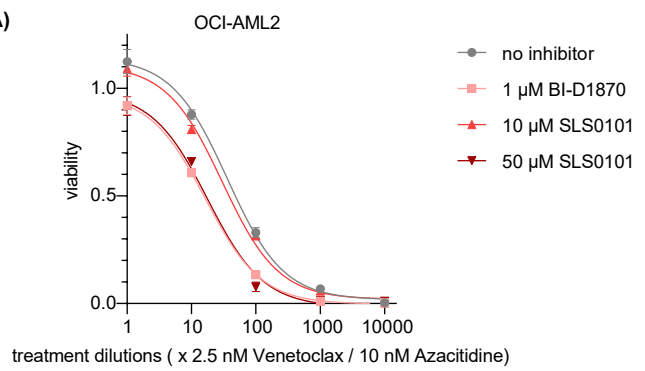

B)

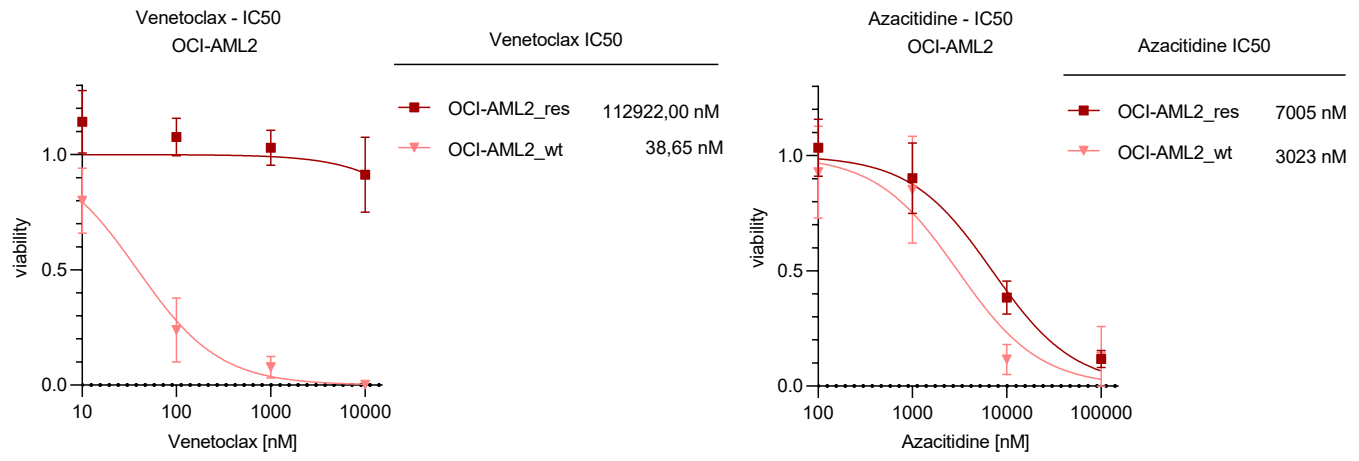

C)

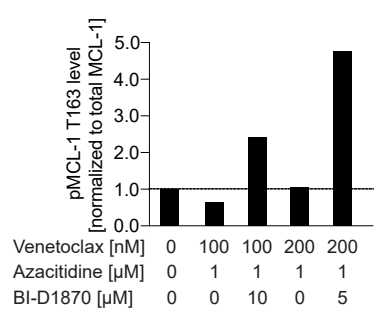

D)

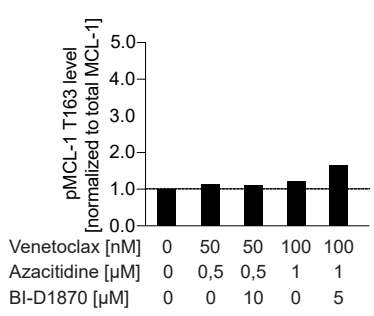

E)

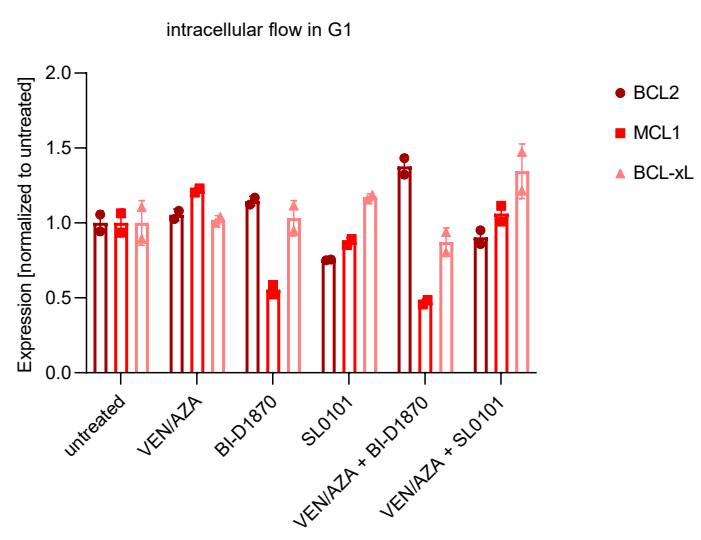



Panel analysis of cell surface markers post CFU assay of OCI-AML2

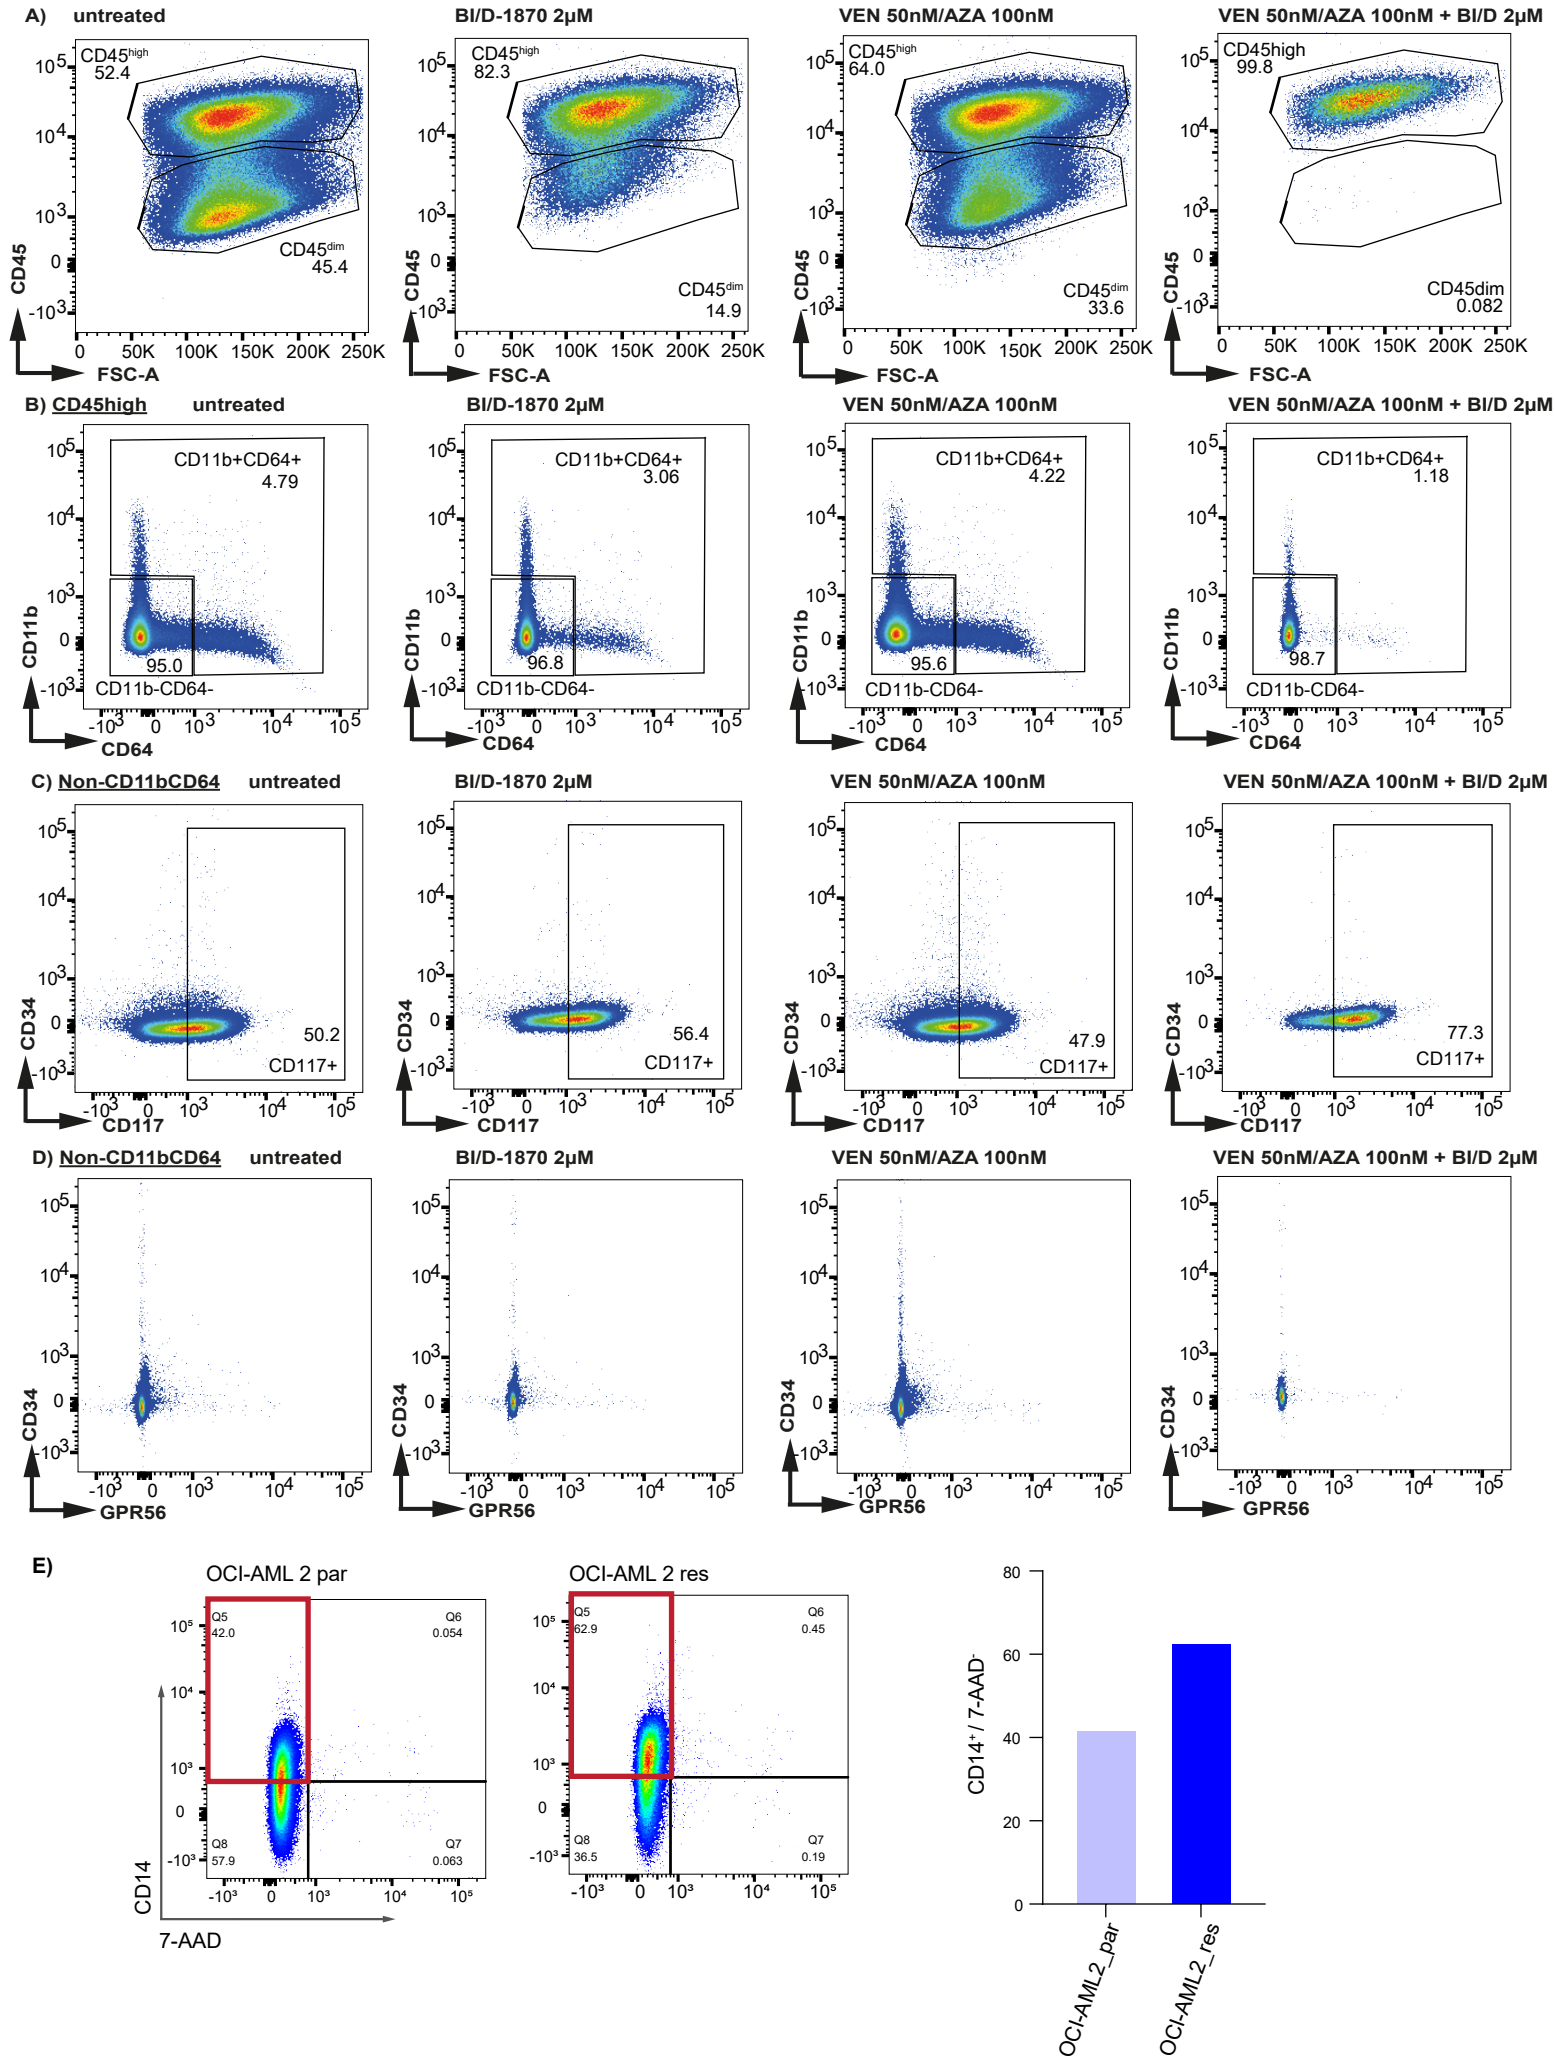

**Supplementary Table S1**

| Sampling timepoint               | ID  | Firstline Treatment                      | Firstline Response | Salvage Treatment                                 | Salvage Response | EFS (days) | Age (years) | Female | Karyotype           | PB Leukocyte counts (/nl) | BM blasts (%) | Mutations (Myeloid panel)          |
|----------------------------------|-----|------------------------------------------|--------------------|---------------------------------------------------|------------------|------------|-------------|--------|---------------------|---------------------------|---------------|------------------------------------|
| sample at relapse                | 53  | 5-AZA/VEN                                | CR/MLFS            | 1st Vyxeos, 2nd High-dose cytarabine+mitoxantrone | PD               | 39         | 45          | yes    | 46,XX               | 11.5                      | 70            | TET2, DNMT3A, KRAS, WT1            |
| first diagnosis                  | 84  | 5-AZA/VEN + allo SCT --> relapse day 100 | CR/MLFS            | FLAG-IDA                                          | CR/MLFS          | 189        | 62          | no     | 46,XY,del5q(q31q35) | 87                        | 82            | NRAS                               |
| sample at relapse post 5-AZA/VEN | 86  | DA+Midostaurin                           | refractory         | 5-AZA/VEN                                         | CR/MLFS          | 90         | 59          | yes    | 46, XX              | 42.6                      | 60            | NPM1, FLT3-ITD (Ratio 0,95), DMT3A |
| first diagnosis                  | 114 | 6x 5-AZA/VEN --> CR                      | CR/MLFS            | NA                                                | NA               | 210        | 72          | yes    | 46, XX              | 56                        | 71            | NPM1, TET2                         |
| sample at relapse                | 81  | 14 x 5-AZA/VEN--> relapse                | CR/MLFS            | NA                                                | NA               | 730        | 73          | no     | 46,XY               | 21                        | 40            | RUNX1, SF3B1                       |

**Supplementary Table S7**

| sample | treatment          | colonies_rep1 | colonies_rep2 | colonies_rep3 |
|--------|--------------------|---------------|---------------|---------------|
| #53    | untreated          | 30            | 33            | 30            |
| #53    | BI-D1870           | 23            | 25            | 25            |
| #53    | VEN/AZA            | 19            | 18            | 16            |
| #53    | VEN/AZA + BI-D1870 | 6             | 9             | 7             |
| #81    | untreated          | 144           | 139           | 139           |
| #81    | BI-D1870           | 62            | 56            | 57            |
| #81    | VEN/AZA            | 54            | 50            | 58            |
| #81    | VEN/AZA + BI-D1870 | 35            | 32            | 35            |
| #84    | untreated          | 8             | 9             | 9             |
| #84    | BI-D1870           | 7             | 6             | 7             |
| #84    | VEN/AZA            | 5             | 4             | 5             |
| #84    | VEN/AZA + BI-D1870 | 2             | 1             | 0             |
| #86    | untreated          | 16            | 17            | 16            |
| #86    | BI-D1870           | 5             | 7             | 5             |
| #86    | VEN/AZA            | 5             | 4             | 4             |
| #86    | VEN/AZA + BI-D1870 | 0             | 0             | 0             |
| #114   | untreated          | 34            | 32            | 34            |
| #114   | BI-D1870           | 17            | 16            | 16            |
| #114   | VEN/AZA            | 12            | 12            | 13            |
| #114   | VEN/AZA + BI-D1870 | 7             | 10            | 7             |
